# Supplementary material
Source: bioRxiv or medRxiv preprint supplement (https://medrxiv.org/highwire/filestream/75659/field_highwire_adjunct_files/0/2020.04.06.20055426-1.pdf)
Supplement: Supplementary file [file 2020.04.06.20055426-1.pdf]

## Understanding the CoVID-19 pandemic Curve through statistical approach

Ibrar ul Hassan Akhtar<sup>a\*</sup>

<sup>a</sup>Department of Meteorology, COMSATS University Islamabad, Park Road, Islamabad, Pakistan

# Supplementary Information

---

\*Correspondence to: Ibrar ul Hassan Akhtar, Department of Meteorology, COMSATS University Islamabad, Park Road, Tarlai Kalan, Islamabad 45550, Pakistan. E-mail: [ibrar.phd.ciit@gmail.com](mailto:ibrar.phd.ciit@gmail.com)

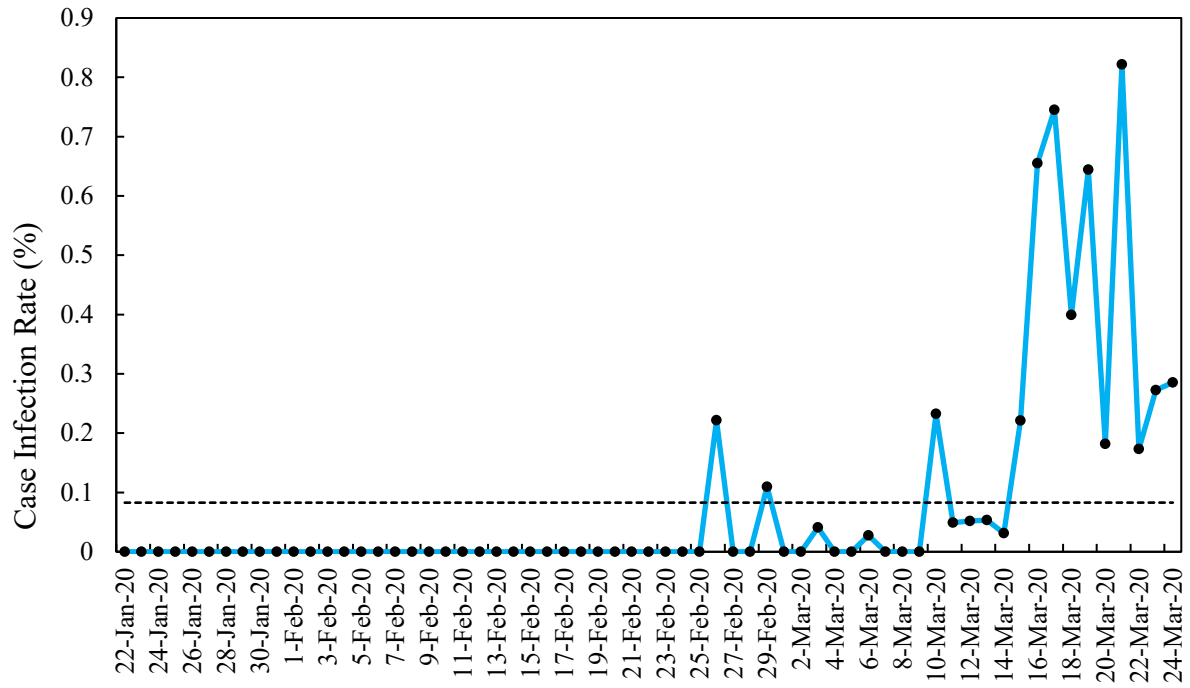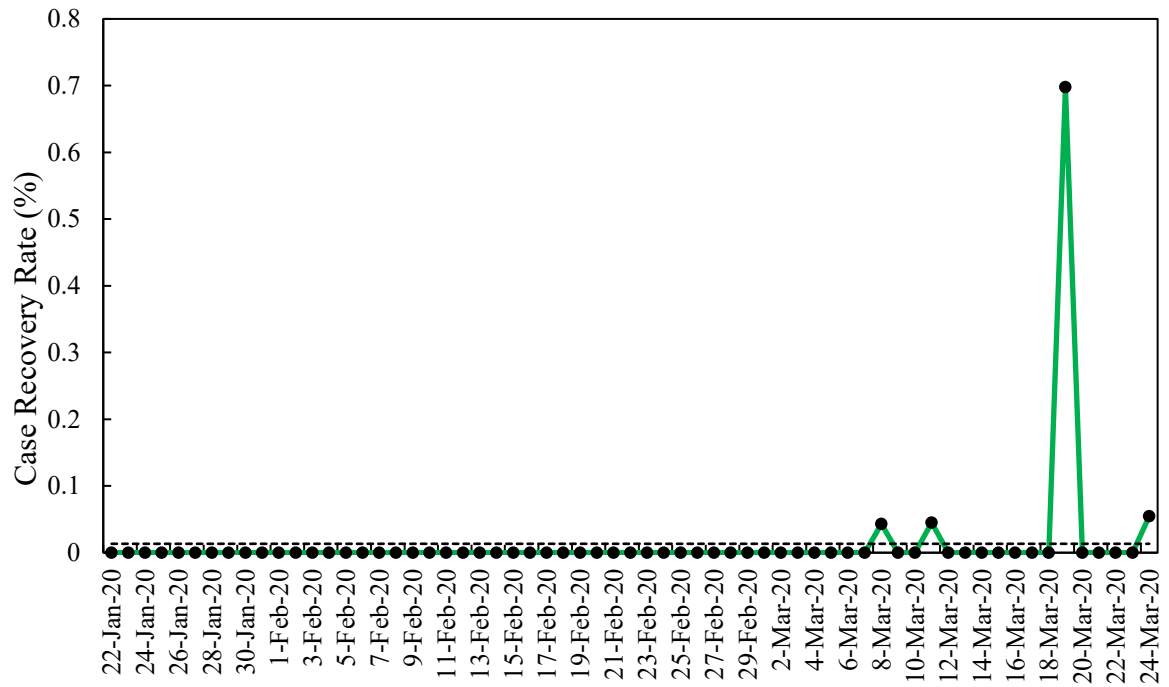

Extended Fig. 1: The COVID-19 daily CIR and CCR for Pakistan

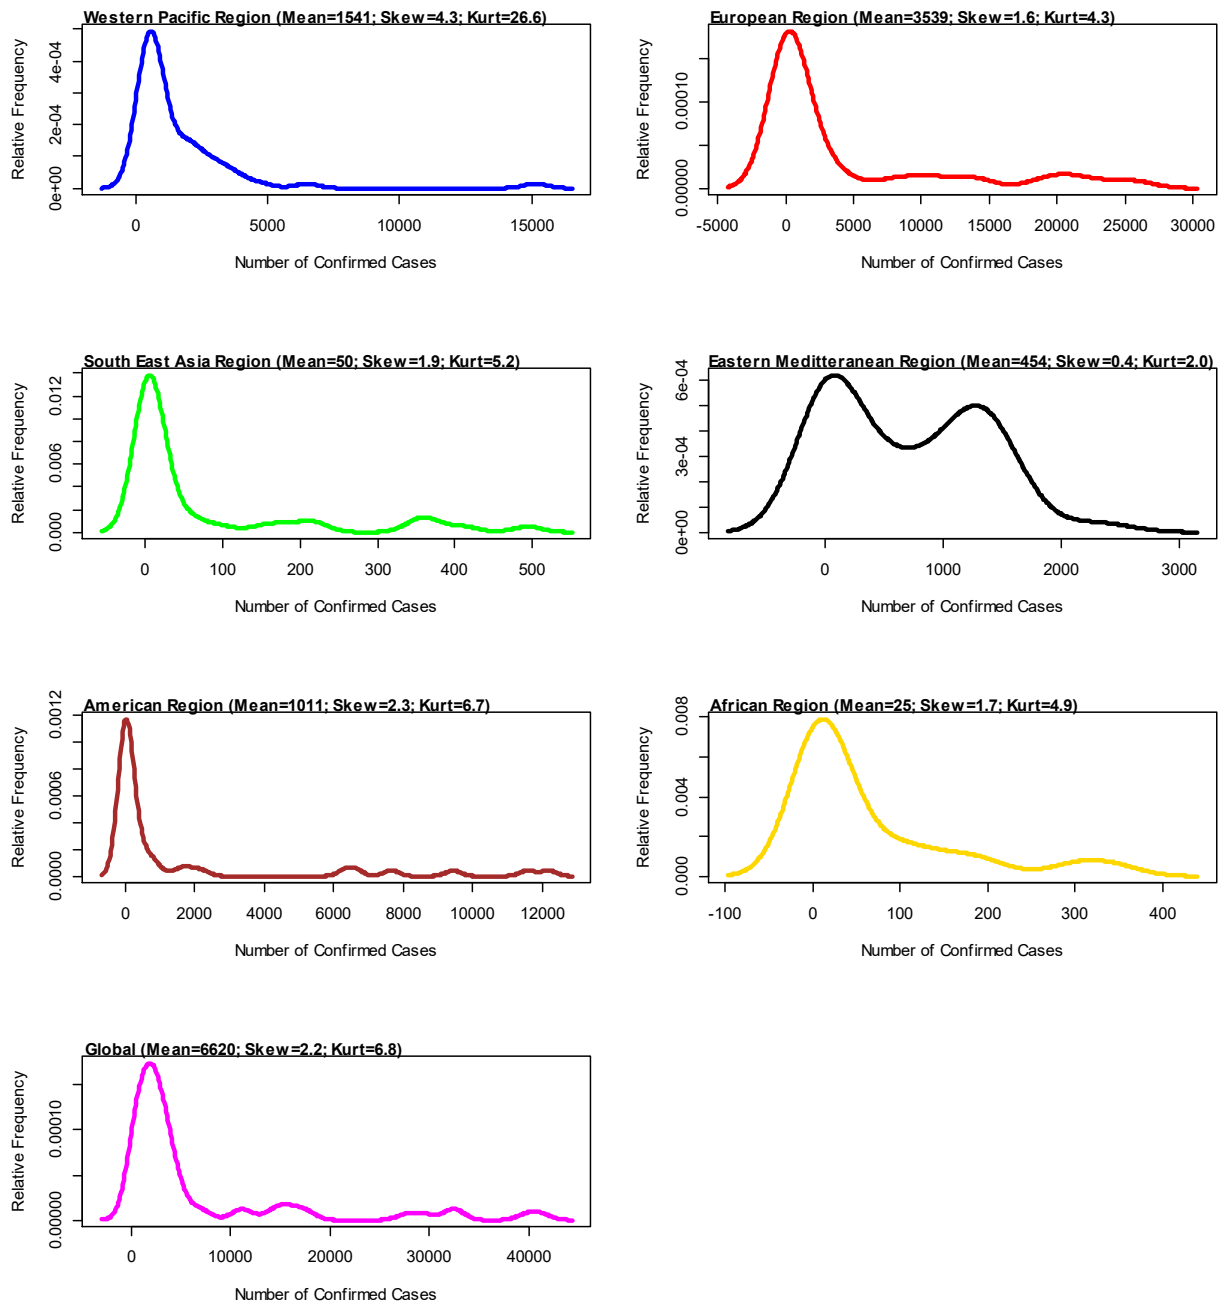

**Extended Fig. 2:** Regional PDFs with skewness and kurtosis of confirmed cases

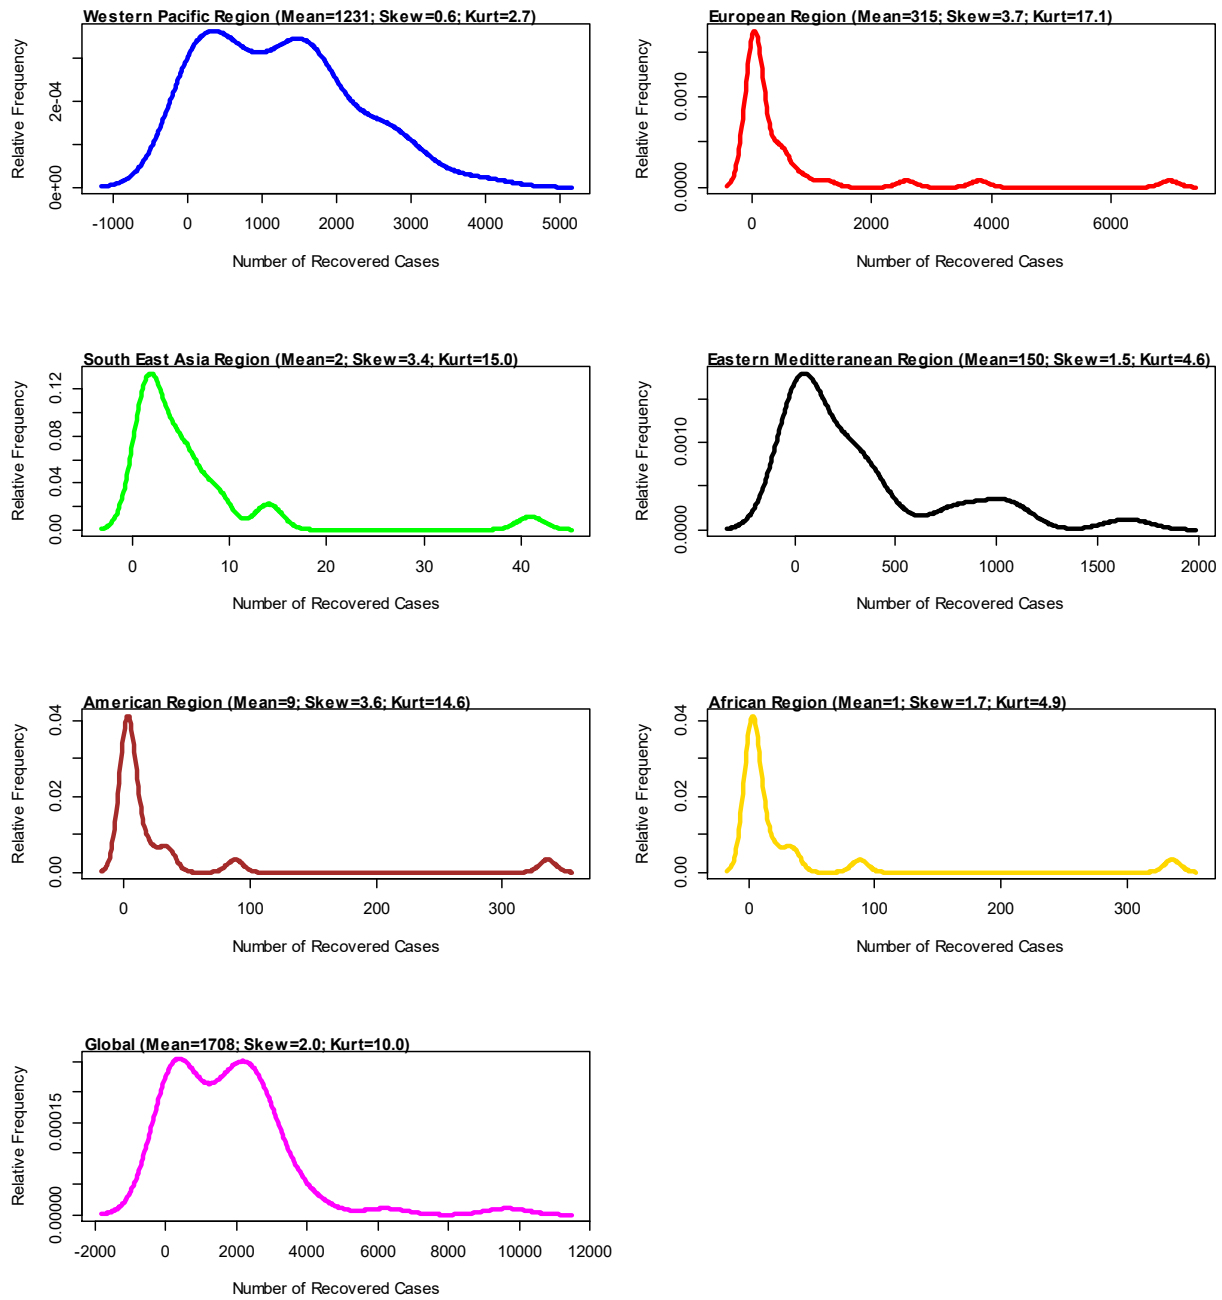

**Extended Fig. 3:** Same as Extended Fig. 2 except for recovered cases

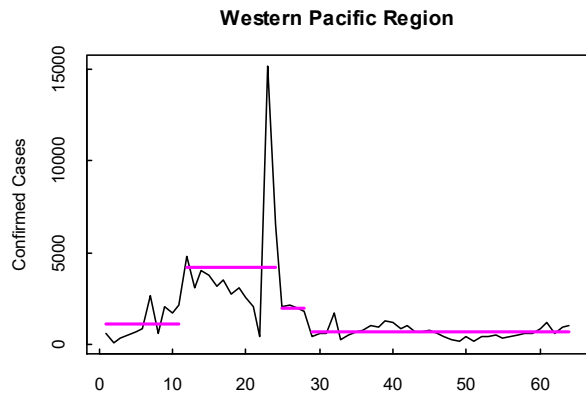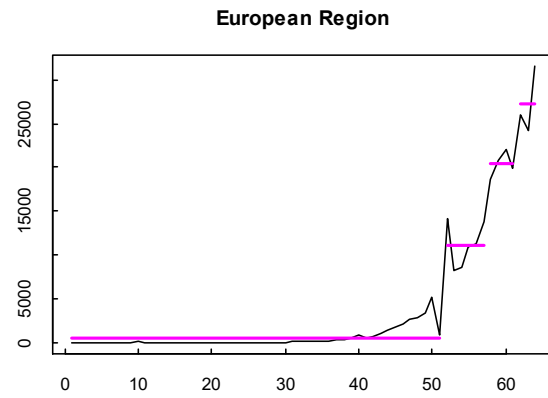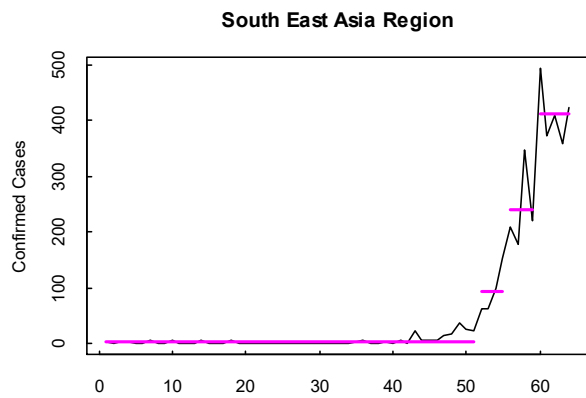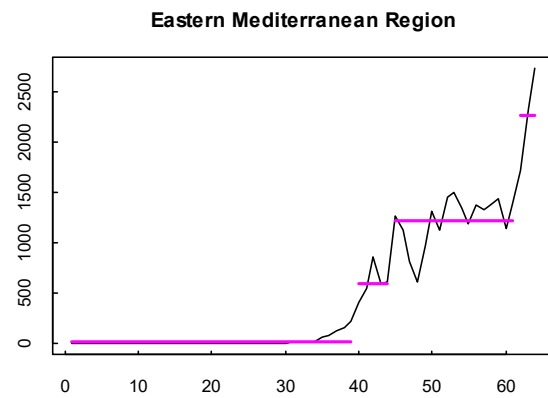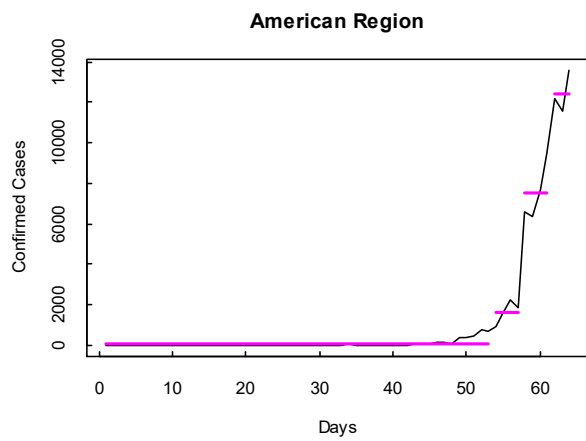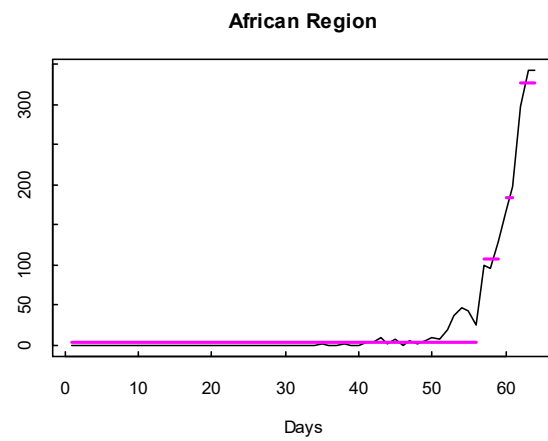

**Extended Fig. 4:** Multiple CPD based on mean at regional scale

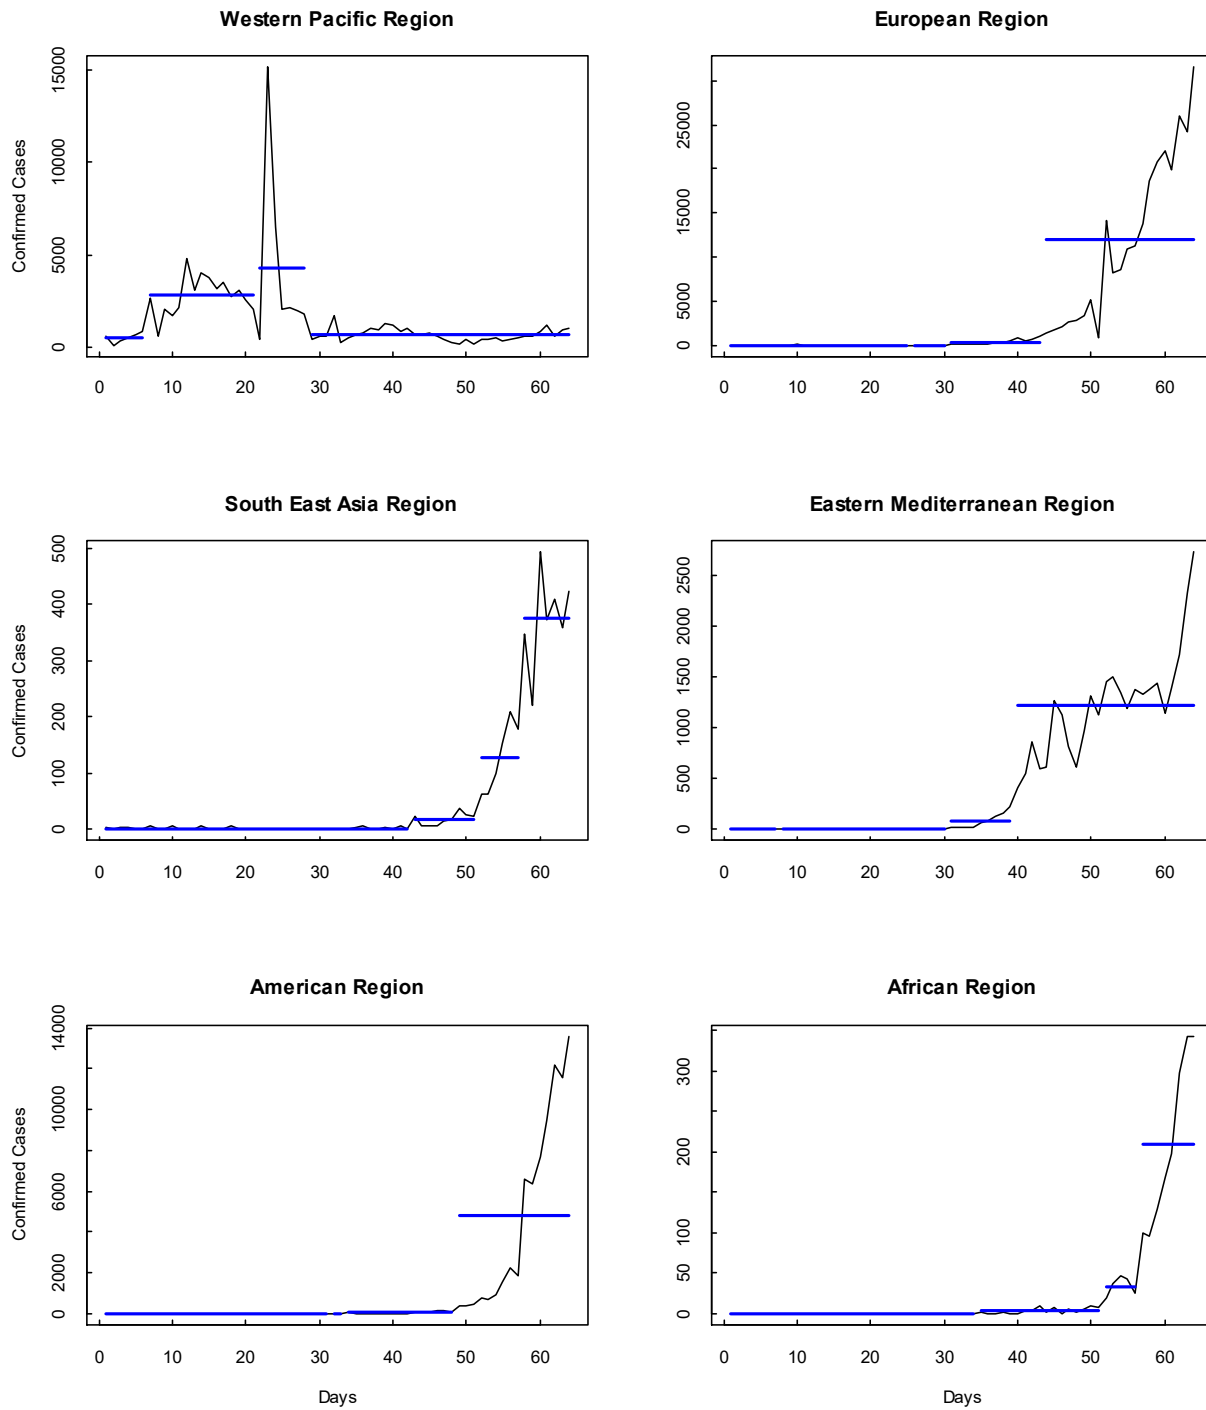

**Extended Fig. 5:** Same as Extended Fig. 4 except for CPD based on mean and variance

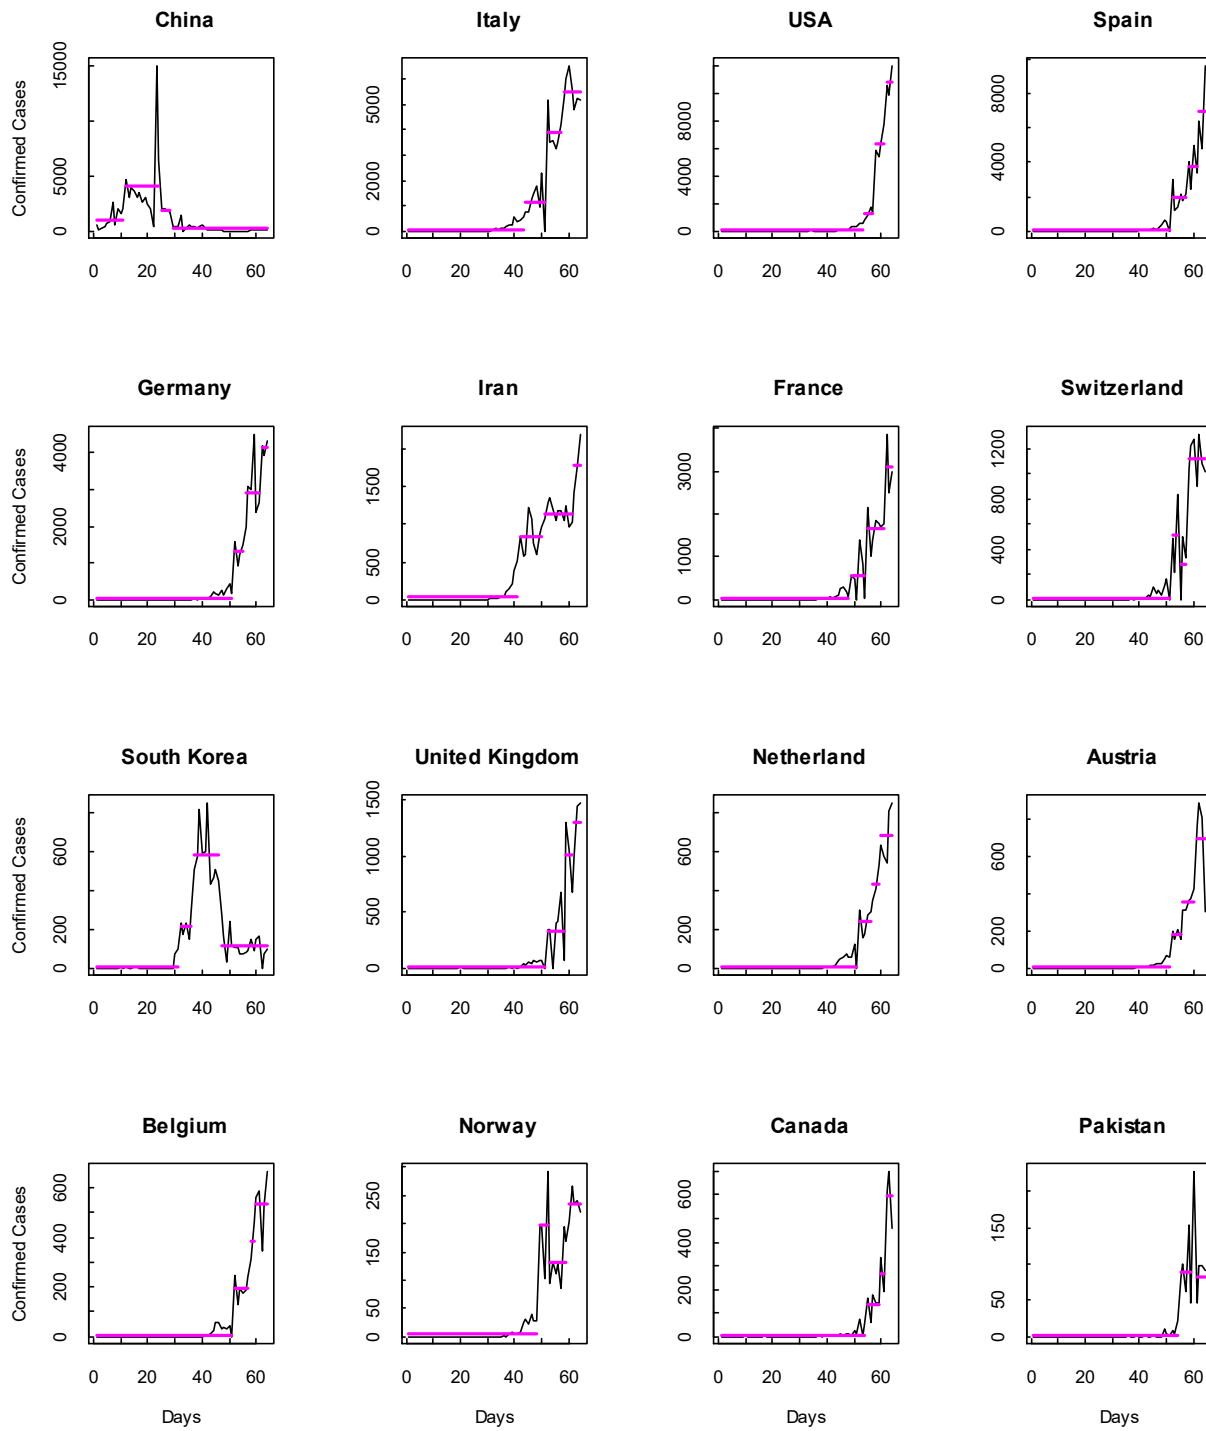

**Extended Fig. 6:** Multiple CPD based on mean at country scale

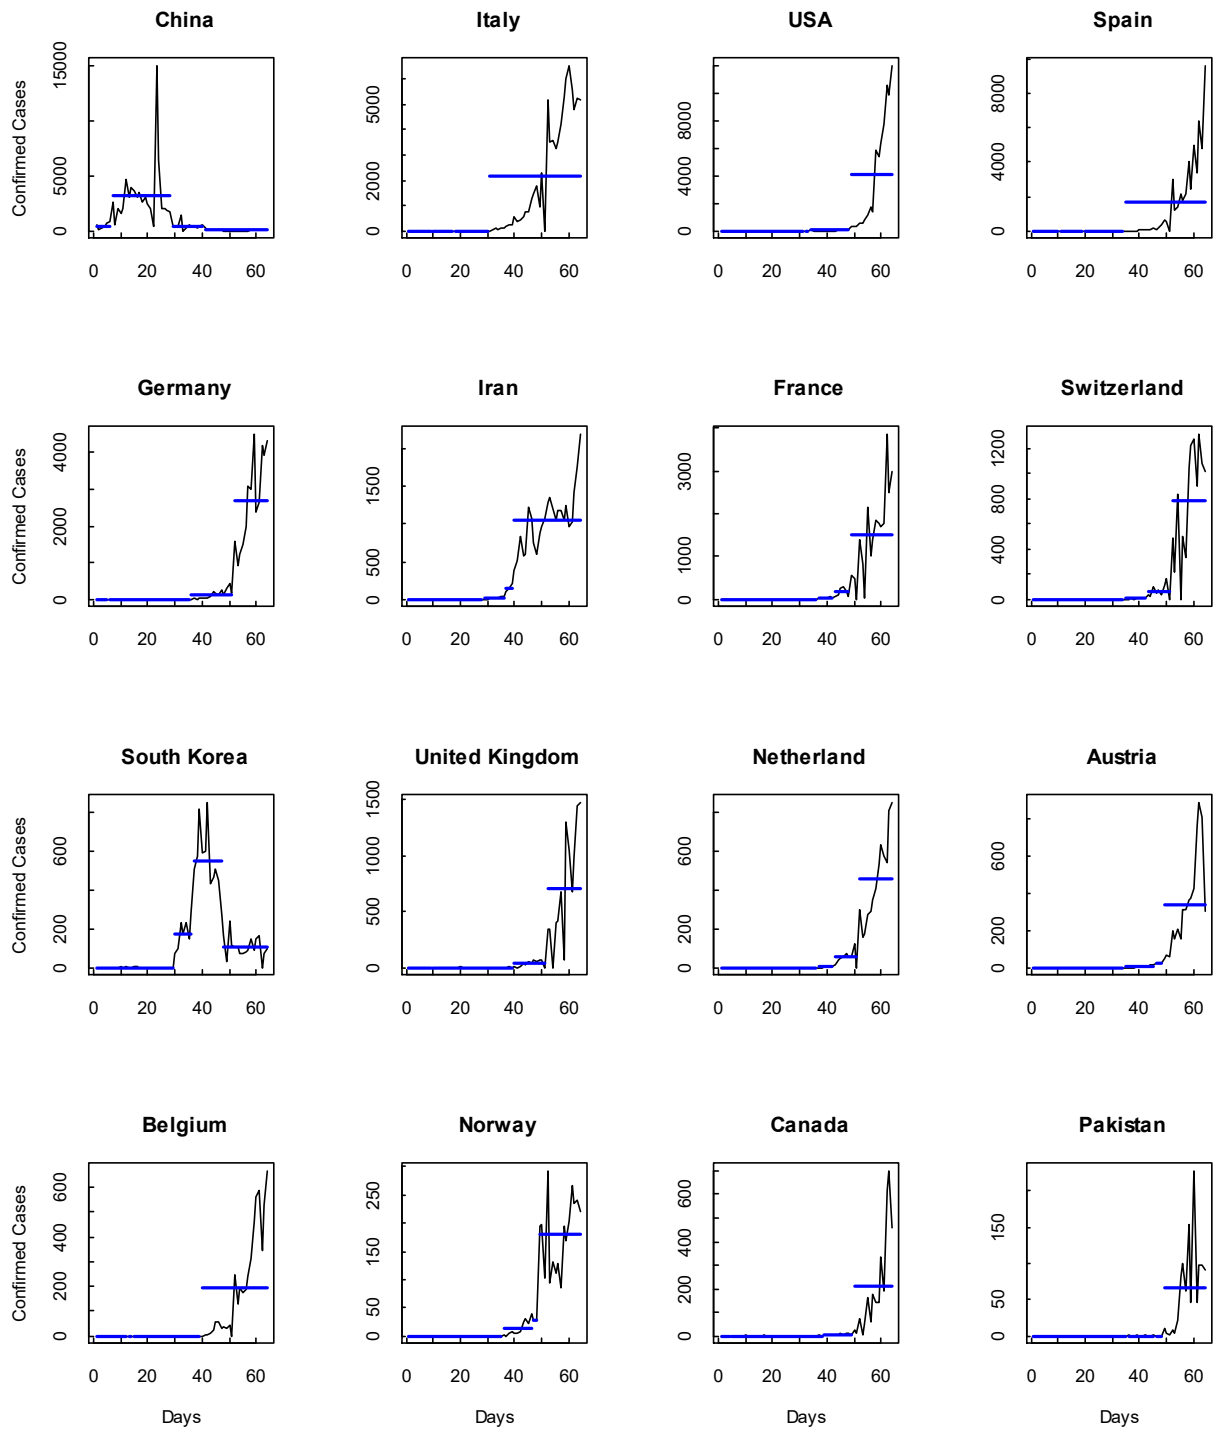

**Extended Fig. 7:** Same as Extended Fig. 6 except for CPD based on mean and variance



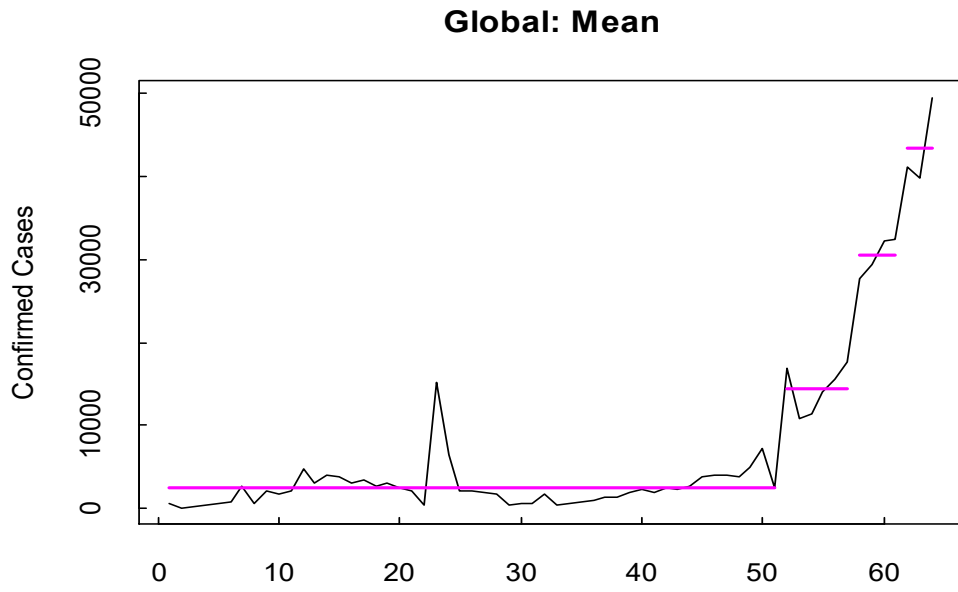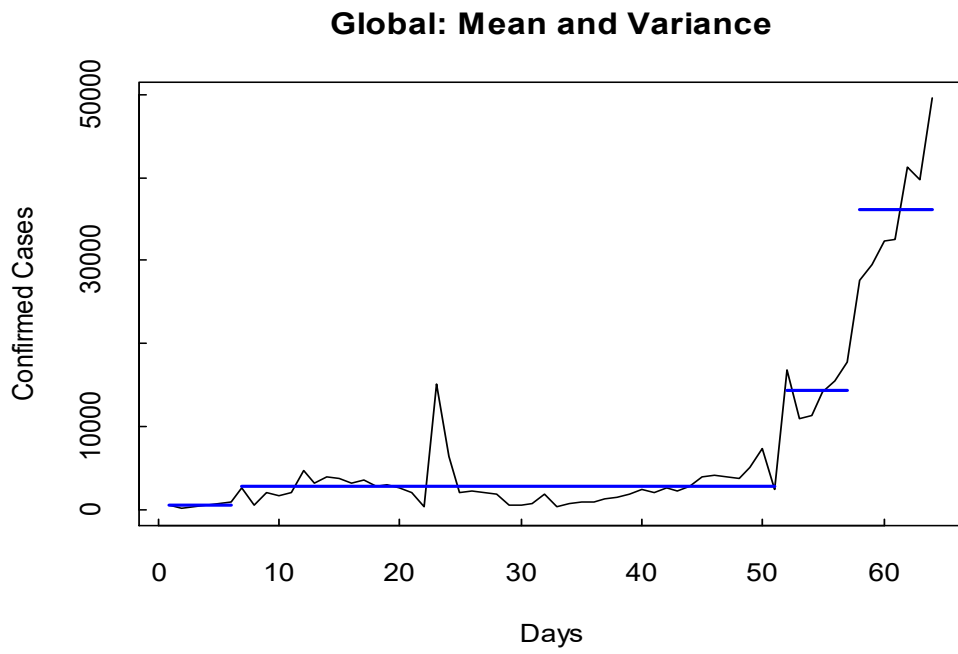

Extended Fig. 8: Global scale multiple CPD.

Infected Population

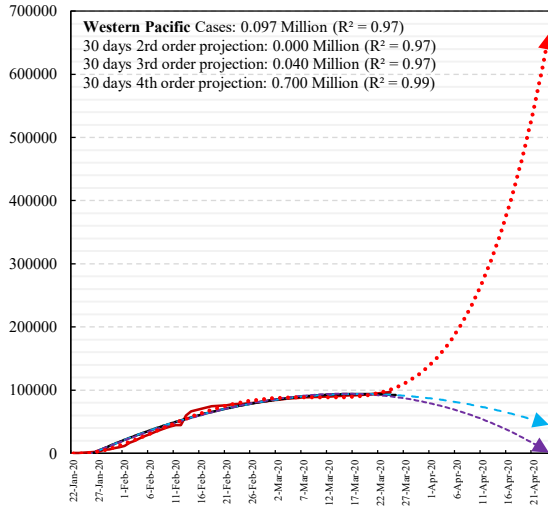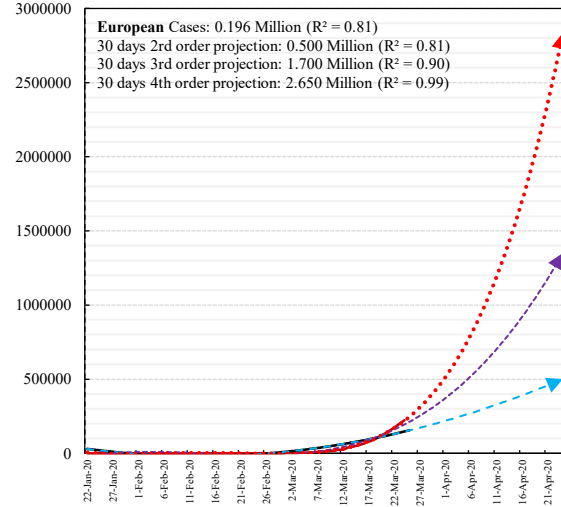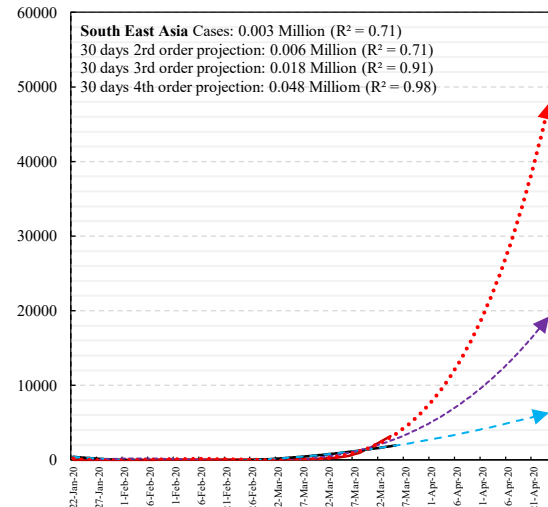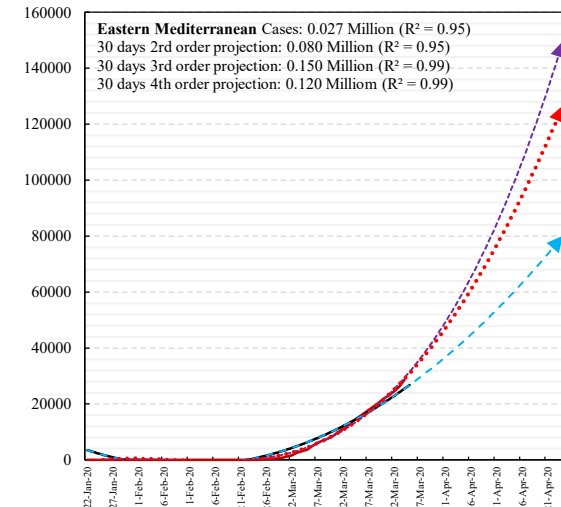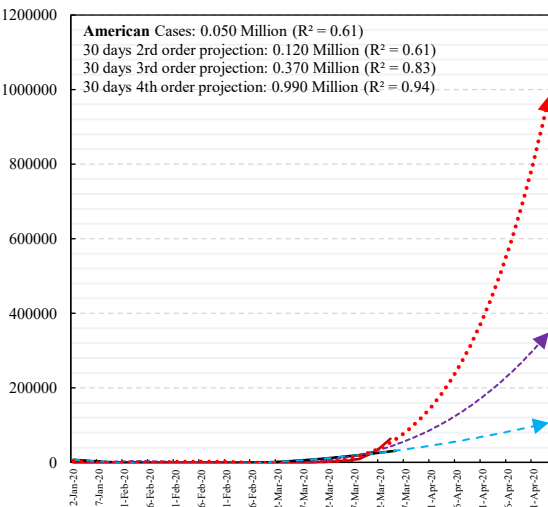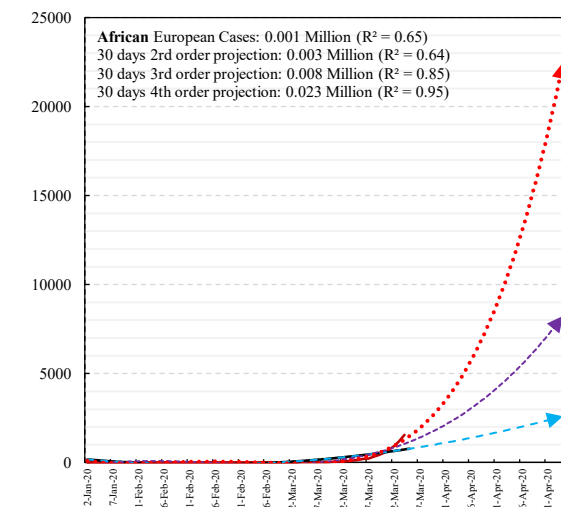

--- 2nd polynomial    - - - 3rd polynomial    ..... 4th polynomial

**Extended Fig. 9:** Regional projected infected population based on 2nd, 3rd and 4th order polynomial curve fitting.

Infected Population

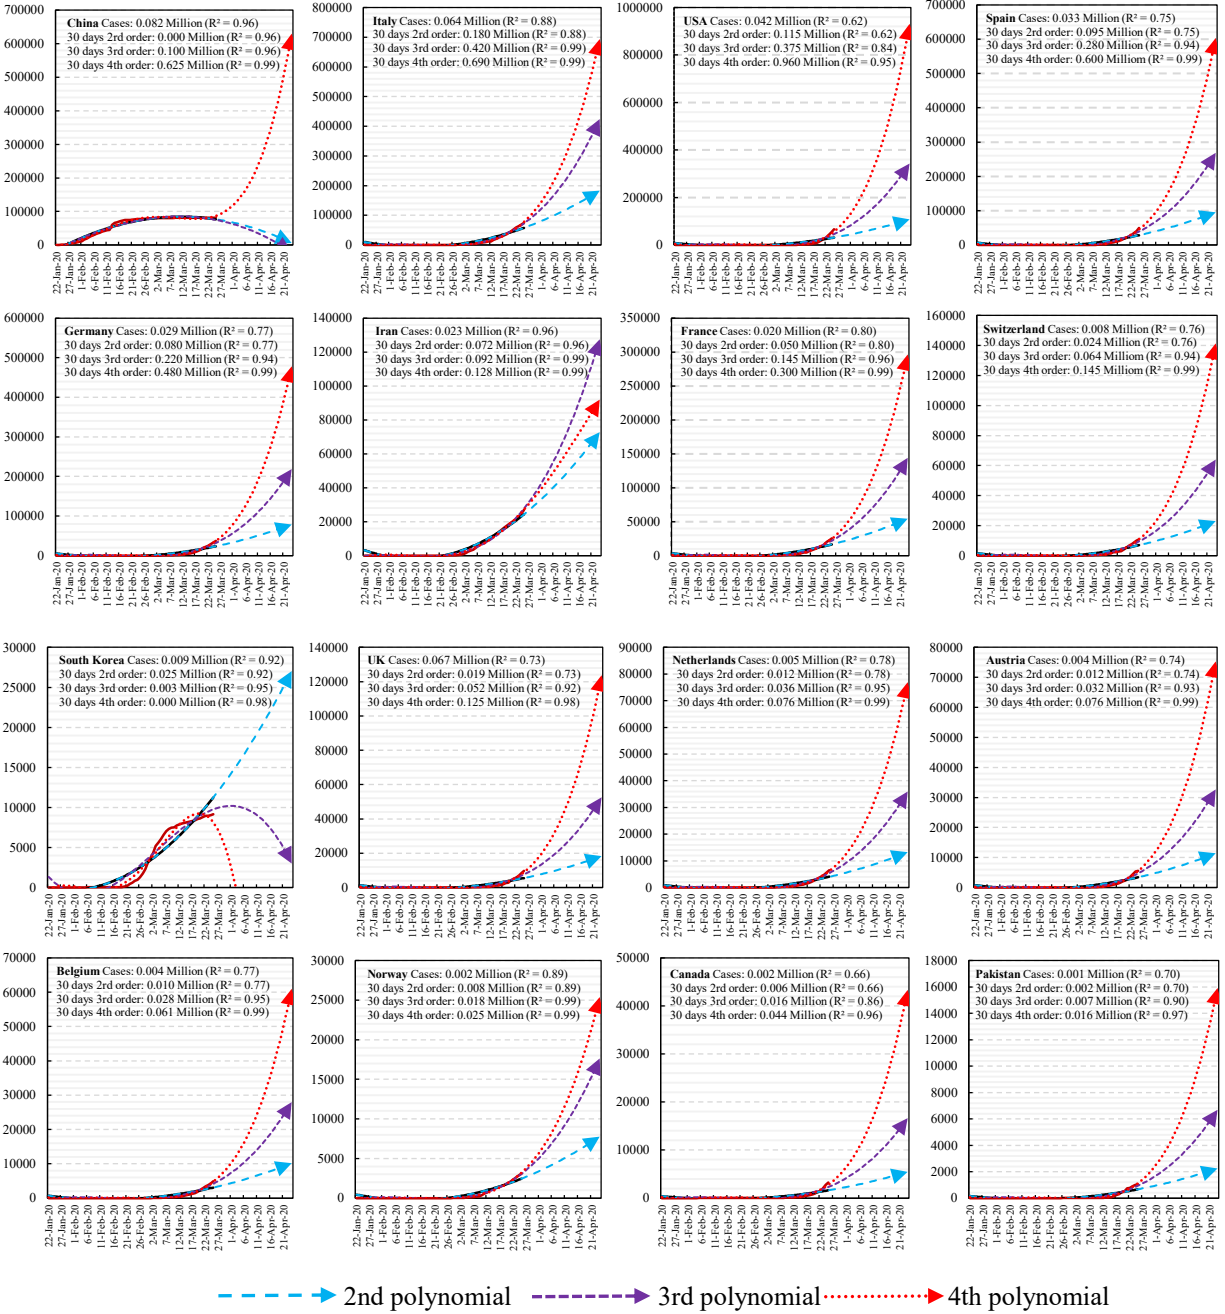

**Extended Fig. 10:** Selected countries projected infected population based on 2nd, 3rd and 4th order polynomial curve fitting.
